# Supplementary material for: Thyroid Hormone Metabolites Quantified in Pup and Adult Rat Cerebellum, Cortex and Whole-Brain Samples Using an Automated Online SPE-LC-MS/MS Method
Source: MDPI journal article supplement (doi:10.3390/metabo14010061), 2024-01-17
Supplement: s1 [file s1]

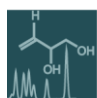

**Table S1.** Overview of MRM transitions and MS parameters.

| RSD [%]/Analyte       | T4    | T3    | rT3     | 3,3'-T2 | 3-T1 |
|-----------------------|-------|-------|---------|---------|------|
| Precursor Mass (m/z)  | 777.7 | 651.9 | 651.900 | 525.5   | 400  |
| Quantifier Ion        | 731.6 | 478.7 | 605.701 | 479.9   | 354  |
| Collision Energy (CE) | 35    | 49    | 33      | 29      | 25   |

**Figure S1.** HPLC chromatogram of analytes and their corresponding isotope labelled internal standard.

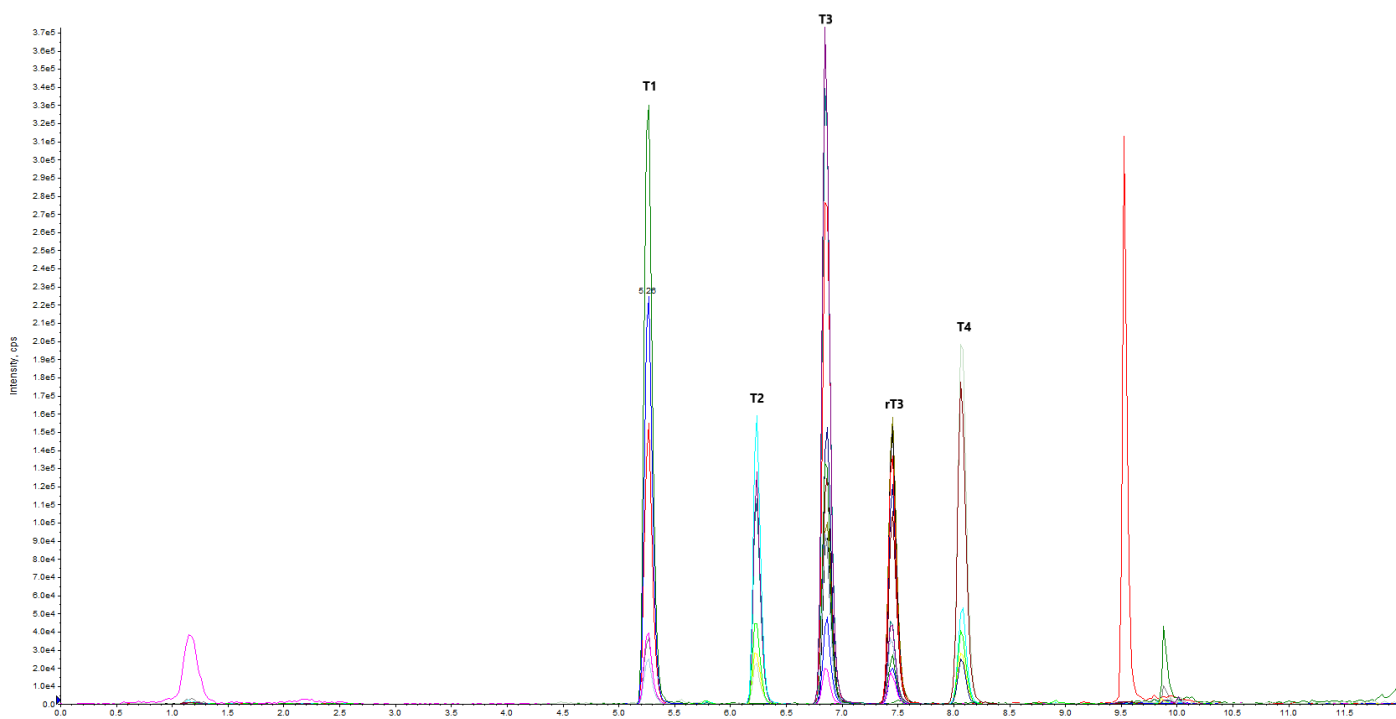

**Table S2.** Listed information of determined method validation parameters.

|                            | T1       | T2        | rT3       | T3     | T4     |
|----------------------------|----------|-----------|-----------|--------|--------|
| Quantifier                 | 256      | 480       | 606       | 479    | 732    |
| LOQ [ng/mL]                | 0.02     | 0.02      | 0.02      | 0.15   | 0.15   |
| Accuracy [%]               | 106      | 110       | 90        | 99     | 99     |
| Precision RSD [%]          | 9.1      | 5.7       | 5         | 2.4    | 1.8    |
| 10 x LOQ Accuracy [%]      | 99       | 116       | 98        | 92     | 104    |
| 10 x LOQ Precision RSD [%] | 3.7      | 3.9       | 3.6       | 3      | 4.2    |
| Calibration range [ng/mL]  | 0.01-0.3 | 0.005-0.5 | 0.005-0.3 | 0.05-2 | 0.05-4 |
| Specificity                | N/A      | N/A       | N/A       | N/A    | 4.9    |
